# Supplementary material for: CEPS: An Open Access MATLAB Graphical User Interface (GUI) for the Analysis of Complexity and Entropy in Physiological Signals
Source: MDPI journal article supplement (doi:10.3390/e23030321), 2021-03-08
Supplement: s1 [file s1]

# CEPS. An open-access MATLAB graphical user interface (GUI) for the analysis of Complexity and Entropy in Physiological Signals

David Mayor, Deepak Panday, Harikala Kandel, Tony Steffert and Duncan Banks

## Supplementary material

**SM1.** A brief review of studies comparing nonlinear measures of complexity or entropy with traditional linear measures

Rather than trying to review all studies on each nonlinear measure that we considered using in CEPS, studies were located in PubMed using the name of each measure (e.g. 'Sample entropy') together with the word 'better' or 'worse'. This reduced the number of studies to something more manageable. The Abstracts – but not the studies themselves – were then examined for comparisons between complexity/entropy and linear or traditional measures, and counts were taken of when the former or the latter were found more useful by the authors of those studies. In many studies, this was not possible, usually because the focus of the study was not on the particular comparison we were interested in (the words 'better' or 'worse' being applied to other comparisons).

The results of this review are shown in tabular form below (Tables S1 and S2). The first column indicates the acronym for the measure in question, the second column the number of studies including the word 'better' (followed by the number including the word 'worse' in parentheses). The third column shows the type of data being investigated, the fourth the first author of the study and year of publication, in date order. In the fifth column, 'y' indicates that nonlinear measures were found in some sense 'better' than the linear or traditional measures with which they were compared (shown in the final column), 'n' that they were 'worse', and 'd' that the measures appeared to quantify different underlying dynamics and so were not directly comparable.

**Table S1.** Review results – complexity measures.

| Measure              | N      | System        | Study                                 | Nonlinear<br>better | Comparator         |
|----------------------|--------|---------------|---------------------------------------|---------------------|--------------------|
| <b>HFD</b>           | 9 (1)  | iv ultrasound | Santos Filho <i>et al.</i> 2008 [154] | y                   | Correlation        |
|                      |        | Intracranial  | Jouny & Bergey 2012 [155]             | y                   | Band power         |
|                      |        | Retina        | Aliahmad <i>et al.</i> 2014 [156]     | y                   | 'Other'            |
|                      |        | EEG           | Kawe <i>et al.</i> 2019 [157]         | y                   | Alpha asymmetry    |
| <b>KFD</b>           | 1 (1)  | [n/a]         |                                       |                     |                    |
| <b>Allan Factor</b>  | 1 (0)  | HRV           | Pawlak-Buś <i>et al.</i> 2005 [158]   | y                   | Standard method    |
| <b>D<sub>2</sub></b> | 30 (1) | HRV           | Skinner <i>et al.</i> 1993 [159]      | y                   | Standard deviation |
|                      |        | EEG           | Pritchard <i>et al.</i> 1994 [160]    | y                   | Standard linear    |

|            |        |                   |                                      |                      |                               |
|------------|--------|-------------------|--------------------------------------|----------------------|-------------------------------|
|            |        | Myoelectric       | Nieminen & Takala 1996 [161]         | y                    | Random stochastic             |
|            |        | EEG               | Stam <i>et al.</i> 1996 [162]        | y + Pwr <sup>1</sup> | Power/reactivity              |
|            |        | EEG (sleep stage) | Fell <i>et al.</i> 1996 [163]        | y / n                | Spectral measures             |
|            |        | EEG               | Grözinger <i>et al.</i> 2001 [164]   | n                    | Spectral powers               |
|            |        | ECG, EEG          | Balli & Palaniappan 2010 [165]       | n                    | Linear AR <sup>2</sup> model  |
|            |        | Voice             | Gao & Hu 2012 [166]                  | y                    | Traditional linear            |
|            |        | EEG               | Eagleman <i>et al.</i> 2018 [167]    | y                    | Traditional spectral          |
| <b>H</b>   | 30 (0) | fMRI              | Maxim <i>et al.</i> 2005 [168]       | y                    | AR model (order 1)            |
|            |        | HRV               | Yum <i>et al.</i> 2008 [169]         | y                    | Spectral indices              |
|            |        | HRV               | Yeh <i>et al.</i> 2010 [170]         | n                    | Empirical mode decomposition; |
|            |        | ECG, EEG          | Balli & Palaniappan 2010 [165]       | n                    | Linear AR model               |
| <b>DFA</b> | 44 (4) | HRV               | Mäkikallio <i>et al.</i> 1998 [171]  | y                    | Conventional HRV measures     |
|            |        | HRV               | Hotta <i>et al.</i> 2005 [172]       | y                    | Traditional linear            |
|            |        | fMRI              | Lee <i>et al.</i> 2008 [173]         | y                    | Deconvolution                 |
|            |        | HRV               | Heitmann <i>et al.</i> 2011 [174]    | y                    | Traditional linear            |
|            |        | HRV               | Jiang & Wu 2011 [175]                | y                    | Spectral indices              |
|            |        | HRV (sleep stage) | Tseng <i>et al.</i> 2013 [176]       | n                    | Spectral power ratio          |
|            |        | HRV               | Téllez <i>et al.</i> 2014 [177]      | n                    | Discrete wavelet transform    |
|            |        | Respiration       | Mumtaz <i>et al.</i> 2015 [178]      | y                    | Logistical regression         |
|            |        | EEG               | Castiglioni <i>et al.</i> 2019 [179] | y                    | Traditional indices           |
|            |        | HRV               | Tsai <i>et al.</i> 2019 [180]        | y                    | Traditional parameters        |
| <b>LLE</b> | 54 (2) | EEG (sleep stage) | Fell <i>et al.</i> 1996 [163]        | y / n                | Spectral measures             |
|            |        | EEG               | Grözinger <i>et al.</i> 2001 [164]   | n                    | Spectral powers               |
|            |        | Respiration       | Yeragani <i>et al.</i> 2002 [181]    | y                    | Traditional time domain       |
|            |        | EEG               | Sackellares <i>et al.</i> 2006 [182] | y                    | Naïve prediction schemes      |
|            |        | EEG               | Khoshnoud <i>et al.</i> 2018 [183]   | y                    | Band power features           |
| <b>RQA</b> | 33 (0) | HRV               | Javorka <i>et al.</i> 2008 [184]     | d                    | Linear parameters             |
|            |        | HRV               | Mohebbi <i>et al.</i> 2011 [185]     | y                    | Other existing approaches     |
|            |        | Posturography     | Ferrufino <i>et al.</i> 2011 [186]   | y                    | Classical statistics          |
|            |        | Respiration       | Terrill <i>et al.</i> 2012 [187]     | y                    | Time-series & spectral anal.  |

|            |        |                   |                                       |   |                                 |
|------------|--------|-------------------|---------------------------------------|---|---------------------------------|
|            |        | Emotional valence | Lichtwarck-A <i>et al.</i> 2012 [188] | y | Valence                         |
|            |        | Surface EMG       | Ito & Hotta 2012 [189]                | y | Traditional frequency analysis  |
|            |        | HRV               | Frondelius <i>et al.</i> 2015 [190]   | d | Linear (time and freq. domain)  |
| <b>PP</b>  | 24 (1) | HRV               | Heitmann <i>et al.</i> 2011 [174]     | y | Linear (time and freq. domain)  |
|            |        | EEG               | Brignol <i>et al.</i> 2013 [191]      | y | Spectral band power             |
|            |        | HRV               | Shi <i>et al.</i> 2018 [192]          | y | Frequency domain                |
|            |        | HRV               | Farah <i>et al.</i> 2018 [193]        | n | Frequency domain                |
|            |        | HRV               | Byun <i>et al.</i> 2019 [194]         | y | Linear indices                  |
| <b>LZC</b> | 18 (0) | EEG               | Zhang <i>et al.</i> 2001 [195]        | y | Median frequency                |
|            |        | EEG               | Huang <i>et al.</i> 2003 [196]        | y | Median frequency, Spectral edge |

1. Measure combined with Power better than Power alone; 2. AR: Autoregressive.

**Table S2.** Review results – entropy measures.

| Measure    | N      | System               | Study                                | Nonlinear<br>better | Comparison                            |
|------------|--------|----------------------|--------------------------------------|---------------------|---------------------------------------|
| <b>SE</b>  | 69 (1) | EEG bicoherence      | Li <i>et al.</i> 2011 [197]          | y                   | Traditional FFT bicoherence           |
|            |        | Image denoising      | Fathi & Naghsh-Nilchi 2012 [198]     | y                   | Standard denoising                    |
|            |        | Temperature          | Papaioannou <i>et al.</i> 2013 [199] | y                   | Sequential organ failure              |
|            |        | Gene expression      | Wang <i>et al.</i> 2014 [200]        | d                   | Differential Coefficient of Variation |
|            |        | Image features       | Yang <i>et al.</i> 2014 [201]        | y                   | SMACC                                 |
|            |        | HIV-1 identification | Wu <i>et al.</i> 2015 [202]          | y                   | prior viral diversity markers         |
|            |        | Peanut allergens     | Johnson <i>et al.</i> 2016 [203]     | y                   | Standard search algorithms            |
|            |        | Brain mapping        | Delic <i>et al.</i> 2016 [204]       | y                   | Fractional anisotropy                 |
|            |        | Water contamination  | Khosravi <i>et al.</i> 2018 [205]    | y                   | Weights-of-Evidence                   |
|            |        | Sedimentation        | Zhu & Peng 2019 [206]                | y                   | Deterministic models                  |
|            |        | MRI (DTI)            | Liang <i>et al.</i> 2019 [207]       | y                   | Traditional methods                   |
| <b>RE</b>  | 9 (1)  | Mechanomyography     | Torres <i>et al.</i> 2008 [208]      | y                   | Other (linear) parameters             |
|            |        | EEG                  | Choi 2015 [209]                      | y                   | [Unclear from Abstract]               |
| <b>M-E</b> | 1 (0)  | [n/a]                |                                      |                     |                                       |
| <b>TE</b>  | 6 (0)  | PET                  | Gao <i>et al.</i> 2013 [210]         | y                   | Traditional methods                   |
|            |        | Temperature          | Papaioannou 2013 [199]               | y                   | Sequential organ failure              |
|            |        | MRI                  | Zhang <i>et al.</i> 2015 [211]       | y                   | Discrete wavelet transform            |

|               |         |                       |                                       |            |                                    |
|---------------|---------|-----------------------|---------------------------------------|------------|------------------------------------|
|               |         | EEG                   | Lazar <i>et al.</i> 2018 [212]        | y          | Bayes, Normal and Vis shrink       |
| <b>KSE</b>    | 4 (0)   | [n/a]                 |                                       |            |                                    |
| <b>PE</b>     | 29 (0)  | EEG                   | Silva <i>et al.</i> 2011 [213]        | y / n      | Spectral params / electromyography |
|               |         | Accelerometer data    | Ihlen <i>et al.</i> 2016 [214]        | y          | 35 conventional gait features      |
|               |         | STABO                 | Aydın <i>et al.</i> 2019 [215]        | y + SVM    | Spectral params + naive Bayes      |
| <b>CE/CCE</b> | 10 (0)  | Cardiac CT            | Zhuang <i>et al.</i> 2015 [216]       | y          | Conventional schemes               |
| <b>ApEn</b>   | 100 (2) | EEG                   | Bruhn <i>et al.</i> 2000 [217]        | y          | Median frequency                   |
|               |         | Respiration           | Yeragani <i>et al.</i> 2002 [181]     | y          | CV of tidal volume                 |
|               |         | EEG                   | Bruhn 2003 [218]                      | y (nonsig) | Bispectral index, SEF95            |
|               |         | HRV                   | Gonçalves <i>et al.</i> 2007 [219]    | d          | Linear spectral indices            |
|               |         | ECG, EEG              | Balli & Palaniappan 2010 [165]        | n          | Linear AR model                    |
|               |         | Mechanomyography      | Sarlabous <i>et al.</i> 2010 [220]    | y          | RMS amplitude                      |
|               |         | EEG                   | López-Cuevas <i>et al.</i> 2013 [221] | y + ANN    | Existing algorithms                |
|               |         | EEG                   | Hsu 2015 [222]                        | y          | Conventional measures              |
|               |         | HRV                   | Choi & Hoh 2015 [223]                 | y          | Conventional parameters            |
|               |         | Centre of pressure    | Williams <i>et al.</i> 2016 [224]     | y          | RMS                                |
|               |         | HRV                   | Kabbach <i>et al.</i> 2017 [225]      | d          | Linear measures                    |
|               |         | Water quality         | Huang <i>et al.</i> 2017 [226]        | y          | AR model, sequential probability   |
|               |         | EEG                   | Khoshnoud <i>et al.</i> 2018 [183]    | y          | Band power features                |
|               |         | Motion analysis       | Zia <i>et al.</i> 2018 [227]          | y          | Prior state-of-the-art methods     |
|               |         | Muscle fatigue        | Du <i>et al.</i> 2018 [228]           | y          | Power & frequency measures         |
|               |         | EEG                   | Chow <i>et al.</i> 2019 [229]         | y          | EEG Theta/beta ratio               |
|               |         | fMRI                  | Nan <i>et al.</i> 2019 [230]          | y          | Regional homogeneity               |
|               |         | fMRI                  | Zhang <i>et al.</i> 2020 [231]        | y          | Functional connectivity            |
|               |         | EEG                   | Saeedi <i>et al.</i> 2020 [232]       | y          | Frequency-based features           |
| <b>SampEn</b> | 120 (4) | EEG                   | Ke <i>et al.</i> 2014 [233]           | y          | EEG power ratio                    |
|               |         | HRV                   | Gonçalves <i>et al.</i> 2007 [219]    | d          | Linear spectral indices            |
|               |         | Base lung sound       | Albuerne-S <i>et al.</i> 2008 [234]   | y          | Spectral percentiles               |
|               |         | EMG                   | Zhou & Zhang 2014 [235]               | y          | Conventional methods               |
|               |         | HRV                   | Choi & Hoh 2015 [223]                 | y          | Conventional methods               |
|               |         | Physical activity     | Aktaruzzaman <i>et al.</i> 2015 [236] | y          | AR coefficients                    |
|               |         | Denoising             | Shen <i>et al.</i> 2016 [237]         | y          | Traditional methods                |
|               |         | Local field potential | Zare <i>et al.</i> 2020 [238]         | n          | LFP power                          |
|               |         | EEG                   | Saeedi <i>et al.</i> 2020 [232]       | y          | Frequency-based features           |

|                      |        |                     |                                                  |       |                                    |
|----------------------|--------|---------------------|--------------------------------------------------|-------|------------------------------------|
| <b>CosEn</b>         | 0 (0)  | [n/a]               |                                                  |       |                                    |
| <b>QSE</b>           | 0 (0)  | [n/a]               |                                                  |       |                                    |
| <b>MSE</b>           | 43 (4) | Pulse wave velocity | Wu <i>et al.</i> 2011 [239]                      | y     | Pulse wave velocity                |
|                      |        | MEG                 | Chu <i>et al.</i> 2015 [240]                     | y     | Rel power in some bands            |
|                      |        | Postural sway       | Zhou <i>et al.</i> 2017 [241]                    | y     | Traditional sway metrics           |
|                      |        | HRV                 | Tsai <i>et al.</i> 2019 [180]                    | y     | Traditional HRV parameters         |
|                      |        | HRV                 | Lin <i>et al.</i> 2016 [242]                     | y     | SDNN, pNN20 (HRV parameters)       |
| <b>FE</b>            | 23 (0) | EEG                 | Lazar <i>et al.</i> 2016 [243]                   | y     | Traditional complex wavelet        |
| <b>DistEn</b>        | 7 (0)  | [n/a]               |                                                  |       |                                    |
| <b>DE</b>            | 3 (0)  | [n/a]               |                                                  |       |                                    |
| <b>SlopeEn</b>       | 0 (0)  | [n/a]               |                                                  |       |                                    |
| <b>BE</b>            | 0 (0)  | [n/a]               |                                                  |       |                                    |
| <b>PhEn</b>          | 1 (0)  | [n/a]               |                                                  |       |                                    |
| <b>DnEn</b>          | 1 (0)  | [n/a]               |                                                  |       |                                    |
| <b>CompressionEn</b> | 2 (0)  | HRV                 | Heitmann <i>et al.</i> 2011 [174]                | y     | Time and frequency domain          |
| <b>SpEn</b>          | 37 (5) | EEG                 | Grözingen <i>et al.</i> 2001 [164]               | n     | Spectral power                     |
|                      |        | EEG (sleep stage)   | Fell <i>et al.</i> 1996 [163]                    | y / n | Spectral measures                  |
|                      |        | EEG                 | Martorano <i>et al.</i> 2006 [244]               | y     | Heart rate, mean arterial pressure |
|                      |        | EEG                 | Kim <i>et al.</i> 2012 [245]                     | n     | Bispectral index                   |
|                      |        | EEG                 | Tiefenthaler <i>et al.</i> 2018 [246]            | y     | Bispectral index                   |
| <b>DiffEn</b>        | 7 (0)  | Heart motion        | Punithakumar <i>et al.</i> 2010, 2013 [247, 248] | y     | Other recent methods               |

+: Combination of nonlinear and another method better or worse than comparator; ANN: Artificial neural networks; DTI: diffusion tensor imaging; iv: intravenous; LFP: Local field potential; SMACC: sequential maximum angle convex cone; STABO: single trial auditory brain oscillations; SVM: support vector machine.

In total, without deduplication, 716 studies were found for these measures in which the word ‘better’ occurred, and 27 containing the word ‘worse’ (suggesting that researchers much prefer to make positive rather than negative claims about their findings).

Of these studies (deduplicated), 83 (around 11%) found that nonlinear measures were more useful than linear or conventional measures in terms of their study objectives, and only 10 (around 1.3%) that they were less useful. Five studies mentioned, explicitly or implicitly, that the nonlinear and other measures used appeared to quantify different underlying dynamics so were not directly comparable.

Many studies could not be categorised in this way, as they used methods such as support vector machine classification or AdaBoost to assess the usefulness of *combinations* of measures, or compared nonlinear measures amongst themselves.

Because of the growing popularity of these combination methods, it was expected that there might be fewer studies comparing nonlinear and linear methods in recent years, but this was not found to be the case (Figure S1).

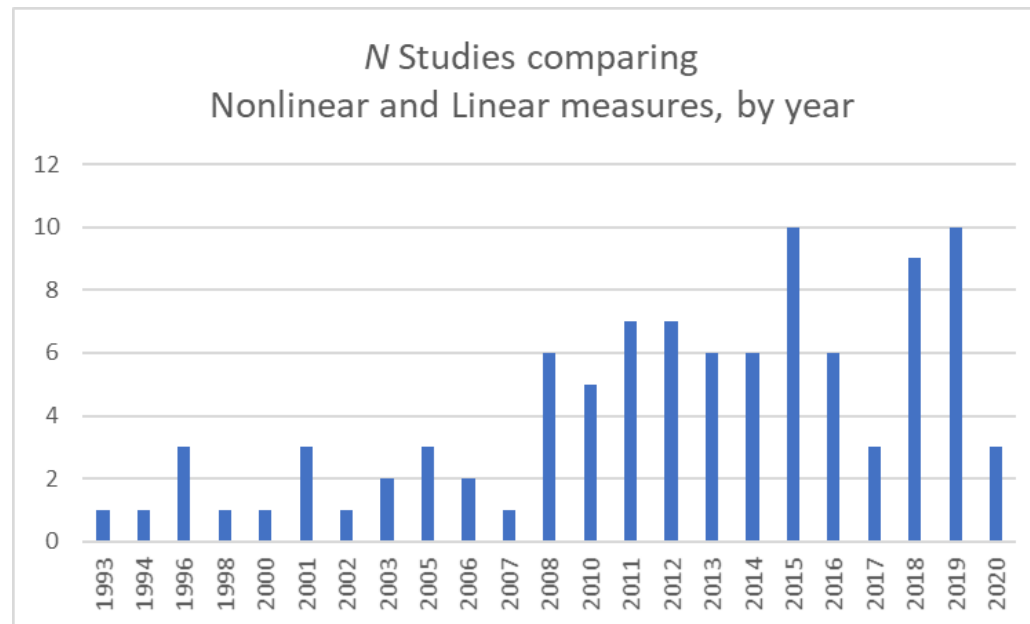

**Figure S1.** Incidence of studies comparing nonlinear and linear/conventional measures, over time.

**SM2.** Names of researchers who have contributed most papers on each complexity and entropy measure

**Table C1.** Numbers of researchers who have authored papers on complexity measures, with names of up to six authors who have written the most papers on each measure (more or less than six if numbers tied) and how many they have written, together with their institutional affiliations. Mean and standard deviation of the number of papers per author for each measure are also shown.

| Measure<br>(N authors <sup>a</sup> ) | Authors                                              | 1st mention  | Institution <sup>b</sup>                | Mean (SD)   |
|--------------------------------------|------------------------------------------------------|--------------|-----------------------------------------|-------------|
| <b>HFD</b><br>(425)                  | Tarmo Lipping (7)                                    | 2004         | Tampere U of Technology                 | 1.28 (0.75) |
|                                      | Aleksandar Kalauzi (6)<br>Sladjana Spasić (5)        | 2005         | U of Belgrade                           |             |
|                                      | Maie Bachmann, Hiie Hinrikus,<br>Jaanus Lass (all 5) | 2005<br>2011 | Tallinn U of Technology                 |             |
| <b>KFD</b><br>(110)                  | Hojjat Adeli (4)                                     | 2010         | Amirkabir U of Technology, Tehran       | 1.05 (0.27) |
|                                      | Amir Adeli (3)                                       | 2010         |                                         |             |
|                                      | Mehran Ahmadi (3)                                    | 2010         |                                         |             |
| <b>AF</b><br>(64)                    | Susan Barman (4)                                     | 2004         | Michigan State U                        | 1.27 (0.68) |
|                                      | Gerard Gebber (4)                                    | 2004         | Boston U                                |             |
|                                      | Paul Fadel (3)                                       | 2004         |                                         |             |
|                                      | Malvin Teich (3)                                     | 1996         |                                         |             |
| <b>D<sub>2</sub></b><br>(2,140)      | Jack J Jiang (31)                                    | 2003         | U of Wisconsin                          | 1.40 (1.29) |
|                                      | Yu Zhang (23)                                        | 2003         | Baylor College of Medicine <sup>c</sup> |             |
|                                      | James E Skinner (18)                                 | 1991         |                                         |             |
|                                      | Cornelis J Stam (16)                                 | 1994         | VU Medical Centre, Amsterdam            |             |
|                                      | Joachim Röscke (12)                                  | 1991         | U of Mainz                              |             |
| <b>H</b><br>(1,410)                  | U Rajendra Acharya (9)                               | 2005         | Singapore U of Social Sciences          | 1.27 (0.75) |
|                                      | Edward T Bullmore (9)                                | 2001         | U of Cambridge                          |             |
|                                      | John Suckling (9)                                    | 2001         |                                         |             |
|                                      | Hans J Herrmann (8)                                  | 2011         |                                         |             |

|                       |                            |      | Universidade<br>Federal do Ceará      |             |
|-----------------------|----------------------------|------|---------------------------------------|-------------|
| <b>DFA</b><br>(3,500) | Chung-Kang Peng (19)       | 1995 | U of Harvard                          | 1.33 (1.07) |
|                       | H Eugene Stanley (19)      | 1995 | Boston U                              |             |
|                       | Ary L Goldberger (18)      | 1995 | Beth Israel<br>Hospital, Boston       |             |
|                       | Shlomo Havlin (15)         | 1995 | Boston U                              |             |
|                       | Heikki Huikuri (13)        | 1999 | U of Oulu                             |             |
| <b>LLE</b><br>(1,470) | Nick Stergiou (25)         | 2003 | U of Nebraska                         | 1.36 (1.14) |
|                       | Vikram Yeragani (12)       | 2001 | Wayne State U                         |             |
|                       | U Rajendra Acharya (9)     | 2005 | Singapore U of<br>Social Sciences     |             |
|                       | Thomas Similowski (9)      | 2006 | Sorbonne<br>Universités               |             |
|                       | Shane R Wurdeman (9)       | 2013 | U of Nebraska                         |             |
| <b>RQA</b><br>(1,200) | Alessandro Giuliani (25)   | 1998 | National Institute<br>of Health, Rome | 1.47 (1.56) |
|                       | Michael A Riley (20)       | 1999 | U of Cincinnati                       |             |
|                       | Charles L Webber Jr (16)   | 1997 | Loyola U                              |             |
|                       | Joseph P Zbilut (16)       | 1998 | Rush U                                |             |
| <b>PP</b><br>(1,290)  | Andreas Voss (19)          | 2007 | Ernst-Abbe-<br>Hochschule Jena        | 1.37 (1.30) |
|                       | Marimuthu Palaniswami (16) | 2001 | U of Melbourne                        |             |
|                       | Luiz Vanderlei (16)        | 2010 | UNESP, São Paulo                      |             |
|                       | Ahsan Khandoker (15)       | 2008 | U of Melbourne                        |             |
|                       | Heikki Huikuri (12)        | 1996 | U of Oulu                             |             |
|                       | Chandan Karmakar (11)      | 2008 | U of Melbourne                        |             |
| <b>LZC</b><br>(720)   | Roberto Hornero (25)       | 2005 | Universidad de                        | 2.33 (3.09) |
|                       | Daniel Abásolo (17)        | 2006 | Valladolid (all)                      |             |



a. Numbers are approximate, because of spelling, forename variations and differences in punctuation; b. Where authors are affiliated to more than one institution, only one of these is shown (selected according to the author's presumed country of origin); c. Then Vicor Technologies, Inc., Boca Raton, FL.

Deduplicating names, a total of approximately 10,200 individuals have authored papers on these complexity measures, with most authors writing on DFA and D<sub>2</sub>, fewest writing on the two measures of fractal dimension and the Allan factor. Although fewer papers were published on LZC than several other measures, on average more papers were published on this topic by single authors than on any other topic, and fewest by single authors on Katz's fractal dimension.

**Table C2.** Numbers of researchers who have authored papers on Symbolic Dynamics, with names of up to six authors who have written the most papers on each measure (more or less than six if numbers tied) and how many they have written, together with their institutional affiliations. Mean and standard deviation of the number of papers per author for each measure are also shown.

| Measure<br>(N authors) | Authors              | 1st mention | Institution                                                     | Mean (SD)   |
|------------------------|----------------------|-------------|-----------------------------------------------------------------|-------------|
| <b>SymDyn</b><br>(895) | Andreas Voss (55)    | 1995        | U of Applied                                                    | 1.63 (2.50) |
|                        | Mathias Baumert (23) | 2002        | Sciences,                                                       |             |
|                        | Jürgen Kurths (17)   | 1995        | Jena                                                            |             |
|                        | Niels Wessel (17)    | 1995        | Universität<br>Potsdam<br>Humboldt-<br>Universität<br>zu Berlin |             |

**Table C3.** Numbers of researchers who have authored papers on entropies, with names of up to six authors who have written the most papers on each measure (more or less than six if numbers tied) and how many they have written, together with their institutional affiliations. Mean and standard deviation of the number of papers per author for each measure are also shown.

| Measure<br>(N authors <sup>a</sup> ) | Authors         | 1st mention | Institution <sup>b</sup> | Mean (SD)   |
|--------------------------------------|-----------------|-------------|--------------------------|-------------|
| <b>SE</b>                            | Shubin Liu (18) | 2007        | U of North Carolina      | 1.17 (0.79) |

|                            |                        |      |                                                |             |
|----------------------------|------------------------|------|------------------------------------------------|-------------|
| (3,700)                    | Ki H Chon (15)         | 2009 | U of Connecticut                               |             |
|                            | Yi Zhang (11)          | 2009 | Hebei U of Science and Technology              |             |
|                            | Jürgen Bajorath (11)   | 2000 | Rheinische Friedrich-Wilhelms-Universität Bonn |             |
|                            | David McManus (11)     | 2012 | U of Massachusetts                             |             |
|                            | Alberto Porta (11)     | 2001 | U of Milan                                     |             |
| <b>AE &amp; EoE</b><br>(3) | Chang Francis Hsu (3)  | 2017 | National Chiao Tung U (Hsinchu)                |             |
| <b>T-E</b><br>(24)         | Ahsan Khandoker (10)   | 2010 | U of Melbourne                                 |             |
|                            | Herbert Jelinek (8)    |      | Charles Sturt U                                |             |
|                            | Toshio Moritani (6)    | 1997 | Kyoto U                                        |             |
|                            | Eiichi Oida (5)        |      |                                                |             |
| <b>RE</b><br>(430)         | Shubin Liu (6)         | 2016 | Hunan Normal U                                 | 1.23 (0.63) |
|                            | Chunying Rong (4)      | 2017 |                                                |             |
|                            | David Cornforth (4)    | 2013 | U of Newcastle                                 |             |
|                            | Michael Hughes (4)     | 2009 | Washington U                                   |             |
|                            | Jon Marsh (4)          | 2009 |                                                |             |
|                            | Kirk Wallace (4)       | 2009 |                                                |             |
|                            | Samuel Wickline (4)    | 2009 |                                                |             |
|                            | John McCarthy (4)      | 2010 |                                                |             |
|                            | Herbert Jelinek (4)    | 2013 | Charles Sturt U                                |             |
| <b>M-E</b><br>(73)         | Jianhua Zhang (2)      | 2015 | East China U of Science and Technology         | 1.01 (0.12) |
| <b>TE</b><br>(290)         | Ervin Lenzi (6)        | 2001 | U Estadual de Ponta Grossa                     | 1.18 (0.62) |
|                            | Sumiyoshi Abe (5)      | 2002 | U of Tsukuba                                   |             |
|                            | YuDong Zhang (5)       | 2008 | Southeast U                                    |             |
| <b>KSE</b><br>(330)        | Jay Robert Dorfman (4) | 1995 | U of Maryland                                  | 1.18 (0.47) |
|                            | Henk van Beijeren (4)  | 2001 | Utrecht U                                      |             |

|                          |                          |      |                                       |             |
|--------------------------|--------------------------|------|---------------------------------------|-------------|
| <b>PE</b><br>(810)       | Xiaoli Li (20)           | 2007 | Beijing Normal U                      | 1.40 (1.26) |
|                          | James Sleigh (13)        | 2008 | Waikato Hospital                      |             |
|                          | Denis Jordan (10)        | 2008 | Technical U Munich                    |             |
|                          | Zhenhu Liang (10)        | 2010 | Yanshan U                             |             |
| <b>CE/CCE</b><br>(540)   | Alberto Porta (38)       | 1998 | U of Milan                            | 1.46 (2.14) |
|                          | Nicola Montano (17)      |      |                                       |             |
|                          | Luca Faes (16)           | 2010 | U of Trento                           |             |
|                          | Vlasta Bari (11)         | 2011 | Politecnico di Milano                 |             |
| <b>ApEn</b><br>(3,500)   | Eleonora Tobaldini (10)  | 2007 | U of Milan                            | 1.70 (3.67) |
|                          | Johannes Veldhuis (170)  | 1994 | U of Virginia                         |             |
|                          | Steven Pincus (74)       | 1991 | Yale U                                |             |
|                          | Ferdinand Roelfsma (60)  | 1996 | Leiden U                              |             |
| <b>SampEn</b><br>(3,310) | Ali Iranmanesh (40)      | 1996 | Salem Veterans Affairs Medical Center | 1.55 (1.55) |
|                          | Roberto Hornero (23)     | 2006 | U of Valladolid                       |             |
|                          | José Joaquín Rieta (21)  | 2007 | U Politècnica de Valencia             |             |
|                          | Raúl Alcaraz (20)        | 2007 | U of Castilla - La Mancha             |             |
|                          | Pascal Madeleine (19)    | 2009 | Aalborg U                             |             |
|                          | Xin Li (17)              |      | Yanshan U                             |             |
|                          | Chengyu Liu (16)         | 2013 | Shandong U                            |             |
|                          | Jiann-Shing Shieh (14)   | 2014 | Yuan Ze U                             |             |
|                          | David Cuesta-Frau (13)   | 2007 | U Politècnica de València             |             |
| <b>CosEn</b><br>(47)     | All authors 1 paper only | 2011 | n/a                                   | 1.00 (1.00) |
| <b>QSE</b><br>(14)       | Nina Burtchen (2)        | 2017 | U of Freiburg                         | 1.29 (0.47) |
|                          | William Fifer (2)        |      | Columbia U                            |             |
|                          | Maristella Lucchini (2)  |      | Politecnico di Milano                 |             |

|                       |                        |        |                                      |             |
|-----------------------|------------------------|--------|--------------------------------------|-------------|
| Maria Signorini (2)   |                        |        |                                      |             |
| <b>fSampEn</b><br>(9) | Raimon Jané            | 2016   | Universitat Politècnica de Catalunya | 4.27 (2.57) |
|                       | Abel Torres            | 2016   |                                      |             |
|                       | Leonardo Sarlabous     | 2016   |                                      |             |
|                       | Luis Estrada           | 2016   |                                      |             |
| <b>MSE</b><br>(1,368) | Chung-Kang Peng (30)   | 2002   | Harvard U                            | 1.63 (1.84) |
|                       | Madalena Costa (24)    | 2002   | Beth Israel Deaconess                |             |
|                       | Ary Goldberger (22)    | 2002   | Medical Center, Boston               |             |
|                       | Men-Tzung Lo (23)      | 2011   | Taipei Veterans General Hospital     |             |
| <b>FE</b><br>(441)    | Chengyu Liu (11)       | 2013   | Southeast U                          | 1.26 (0.81) |
|                       | U Rajendra Acharya (5) | 2016   | Singapore U of Social Sciences       |             |
|                       | Alberto Fernández (5)  | 2013   | U Complutense de Madrid              |             |
|                       | Jianfeng Hu (5)        | 2017   | Jiangxi U of Technology              |             |
|                       | Peng Li (5)            | 2013   | Shandong U                           |             |
| <b>DE</b><br>(34)     | Javier Escudero (4)    | 2016   | Edinburgh U                          | 1.21 (0.64) |
|                       | Hamed Azami (3)        |        |                                      |             |
| <b>SlopeEn</b><br>(0) | David Cuesta-Frau (0)  | [2019] | U Politècnica de València            | n/a         |
| <b>BE</b><br>(5)      | George Manis (1)       | 2017   | U of Ioannina                        | 1.00 (0.00) |
|                       | Roberto Sassi (1)      | 2017   | Studi di Milano                      |             |
|                       | David Cuesta-Frau (1)  | 2019   | Universitat Politècnica de València  |             |

|                                    |                                                                                                                                |                                      |                                                                                  |             |
|------------------------------------|--------------------------------------------------------------------------------------------------------------------------------|--------------------------------------|----------------------------------------------------------------------------------|-------------|
| <b>PhEn</b><br>(2)                 | Ashish Rohila (1)<br>Ambalika Sharma (1)                                                                                       | 2019                                 | Indian Institute of<br>Technology                                                | 1.00 (0.00) |
| <b>DisteEn<sup>c</sup></b><br>(28) | Peng Li (10)<br>Chandan Karmakar (8)<br>Marimuthu Palaniswami (7)                                                              | 2013<br>2008<br>2001                 | Shandong U<br>U of Melbourne                                                     | 1.29 (0.78) |
| <b>DnEn</b><br>(109)               | Huijie Yang (8)                                                                                                                | 2004                                 | U of Shanghai for<br>Science and<br>Technology                                   | 1.33 (1.03) |
|                                    | Paolo Grigolini (7)<br>Changgui Gu (3)                                                                                         | 2002<br>2013                         | U of North Texas<br>U of Shanghai for<br>Science and<br>Technology               |             |
|                                    | Nicola Scafetta (3)                                                                                                            | 2002                                 | Duke U                                                                           |             |
| <b>SpEn</b><br>(1,118)             | Hornero Roberto (17)<br>Jesús Poza (13)<br>James Sleight (11)<br>Alberto Fernandez (10)<br>Javier Escudero (8)                 | 2006<br>2006<br>2001<br>2007<br>2007 | U of Valladolid<br>Waikato Hospital<br>U Complutense de<br>Madrid<br>Edinburgh U | 1.33 (1.06) |
| <b>DiffEn</b><br>(208)             | 5 authors from 2 research<br>groups were mentioned 5 times<br>each:<br>Kumaradevan Punithakumar,<br>Ismail Ben Ayed, Ali Islam | 2009<br>2009                         | GE Healthcare,<br>London, ON                                                     | 1.38 (0.89) |
|                                    | NA Kampanis<br>PG Katonis                                                                                                      | 2009<br>2009                         | Technological and<br>Educational Institute,<br>Crete                             |             |

a. Numbers are approximate, because of spelling, forename variations and differences in punctuation;

- b. Where authors are affiliated to more than one institution, only one of these is shown (selected according to the author's presumed country of origin);  
 c. Quite a number of the 'Distribution entropy' studies listed in PubMed refer to methods other than those of Li *et al.*

Deduplicating names, a total of approximately 12,400 individuals have authored papers on these entropy measures, with most authors writing on SE and ApEn, fewest writing on new measures such as BE and PhEn. On average, more papers were published on ApEn by single authors than on any other entropy measure, and fewest by single authors on CosEn, BE and PhEn.

In total, around 20,100 individuals authored the papers on complexity or entropy measures that were located using PubMed on 6 August 2020.

**SM3.** Software packages for physiological data analysis, with primary references, showing operating system and platform used, which are GUIs, the main data types and formats for which the software can be used, complexity and entropy measures implemented, and numbers of Google Scholar and SCOPUS citations of the software. Citation numbers are approximate, and grouped as follows: <10 \*; 10-100 \*\*; 100-500 \*\*\*; 500-2,500 \*\*\*\*; 2,500-5,000 \*\*\*\*\*; >5,000 \*\*\*\*\*. Free or open-source software is indicated by '[F]' in the GUI column (or by '[f]' if supported only in a subscription version of the software), and if batch processing is known to be supported, this is indicated by '[B]' in the 'Format' column (or by '[b]' if supported only in a subscription version). Information on pre-processing methods available was also gathered, but is not included here.

Note that it was not possible to locate all relevant details for every package. This Table is based in part on the useful summary by the creators of PyBioS [24].

| Name                                                           | Platform                        | OS                       | GUI     | Main purpose                               | Format                                  | Complexity                        | Entropy | GoogleScholar | SCOPUS |
|----------------------------------------------------------------|---------------------------------|--------------------------|---------|--------------------------------------------|-----------------------------------------|-----------------------------------|---------|---------------|--------|
| <b>Acq-Knowledge</b><br>[249]                                  |                                 |                          | yes     | ?                                          | product-specific                        |                                   |         | ***           | *      |
| <b>aHRV</b><br>(Nevrokard)<br>[25]                             |                                 |                          | yes     | baroreflex<br>sensitivity                  |                                         | CZF Fractal<br>variance           | no      | **            | *      |
| <b>AnyWave</b><br>[32]                                         | MATLAB (& C)                    | Windows,<br>Linux, MacOS | yes [F] | Electrophys-<br>iological signals          | .trc, .cnt, .vhdr,<br>.meg4, .bdf, .eeg | no                                | no      | **            | **     |
| <b>ARTiiFACT</b><br>[250]                                      | MATLAB                          | Windows                  | yes [F] | ECG                                        | ECG, IBI [b]                            | no                                | no      | ***           | ***    |
| <b>Biopeaks</b><br>[251]                                       | Python                          |                          | yes [F] | ECG, PPG,<br>respiration                   | EDF, .txt, .csv,<br>.tsv [b]            | no                                | no      | *             |        |
| <b>Biopsychology<br/>Nonlinear<br/>Analysis Toolbox</b><br>[5] | MATLAB                          |                          | yes [F] | EEG, MEG                                   | ASCII                                   | D2, H, LLE,<br>time-delayed<br>MI |         | *             | *      |
| <b>BioSig</b><br>[252]                                         | C/C++,<br>MATLAB (or<br>Octave) |                          | no [F]  | EEG, ECoG,<br>ECG, EOG,<br>EMG, Resp, etc. |                                         | no                                | no      | *****         | ***    |

|                                             |              |                          |         |                                          |                |                                                                                                                                                          |                                                                                             |      |      |
|---------------------------------------------|--------------|--------------------------|---------|------------------------------------------|----------------|----------------------------------------------------------------------------------------------------------------------------------------------------------|---------------------------------------------------------------------------------------------|------|------|
| <b>BioSPPy</b><br>[253]                     | Python       |                          | no [F]  | BVP, ECG, EEG,<br>EDA, EMG,<br>Resp, SCG |                | no                                                                                                                                                       | no                                                                                          | ***  |      |
| <b>Brainstorm</b><br>[19]                   | MATLAB       |                          | yes [F] | EEG, MEG                                 | various [B]    |                                                                                                                                                          |                                                                                             | **** | **** |
| <b>CardioSeries</b><br>[61]                 | LabView      | Windows                  | yes [F] | ECG                                      | Txt            | no                                                                                                                                                       | no                                                                                          | ***  | *    |
| <b>Chaos Data Analyzer</b><br>[29]          | PowerBASIC   |                          | no      | nonspecific                              | ASCII [B]      | D2, LLE, PP;<br>Hausdorff<br>dimension                                                                                                                   | no                                                                                          | *    | *    |
| <b>Complexity</b><br>[28]                   | MATLAB       |                          | [F]     | fMRI                                     |                | no                                                                                                                                                       | ApEn, Cross-<br>ApEn, SampEn                                                                |      |      |
| <b>EasieRR</b><br>[56]                      | MATLAB       | Windows                  | yes [F] | ECG                                      | ECG (txt, mat) | PP                                                                                                                                                       |                                                                                             | *    | *    |
| <b>ECG signal acquisition system</b><br>[6] | MATLAB       |                          | yes     | data acquisition<br>& analysis           |                | no                                                                                                                                                       | no                                                                                          | **   | **   |
| <b>ECGLab</b><br>[57]                       | MATLAB       |                          | no      | HRV                                      | ASCII or ECG   | PP                                                                                                                                                       | no                                                                                          | ***  | **   |
| <b>EEGFrame</b><br>[20]                     | Java         |                          | yes     | EEG                                      | txt, EDF       | FD & HFD, AF,<br>H, D2, DFA,<br>LLE, RPA, PP,<br>LZC; Central<br>Tendency<br>Measure (CTM),<br>Sequential<br>Trend Analysis,<br>Spatial Filling<br>Index | CarnapEntropy<br>1D, CCE<br>(Shannon),<br>MaxApEn, RE,<br>MaxSampEn,<br>Mutual<br>dimension | ***  | *    |
| <b>EEGLab</b><br>[17]                       | MATLAB       |                          | Yes [F] | EEG                                      | various [B]    | no                                                                                                                                                       | short-term<br>Rényi entropy<br>[toolbox<br>plug-in]                                         | *    | *    |
| <b>ELAN</b><br>[18]                         | MATLAB (& C) | Windows,<br>Linux, MacOS | yes [F] | EEG, MEG,<br>ECoG, LFP                   | [B]            | no                                                                                                                                                       | no                                                                                          | ***  | **   |

|                                            |        |                          |         |                          |                                        |                                                                                                                                                          |                                                     |       |       |
|--------------------------------------------|--------|--------------------------|---------|--------------------------|----------------------------------------|----------------------------------------------------------------------------------------------------------------------------------------------------------|-----------------------------------------------------|-------|-------|
| <b>EZ Entropy</b><br>[9]                   | MATLAB | Windows,<br>Linux, MacOS | yes [F] | ASCII, .mat,<br>EDF, GDF | ASCII [B]                              | no                                                                                                                                                       | ApEn, SampEn,<br>FE; CE; PE;<br>DistEn              | *     | **    |
| <b>FieldTrip</b><br>[254]                  | MATLAB |                          | no [F]  | MEG, EEG                 | various [B]                            | no                                                                                                                                                       | transfer entropy                                    | ***** | ***** |
| <b>FracLab</b><br>[255]                    | MATLAB |                          | yes [F] | Fractal analysis         |                                        | fractal and<br>multifractal<br>analysis:<br>dimensions,<br>Holder<br>exponents,<br>multifractal<br>spectra                                               | no                                                  | ****  | *     |
| <b>gHRV</b><br>[7]                         | Python | Windows,<br>Linux, MacOS | [F]     | HRV                      | txt, hrm, sdf, ste                     | FD, PP                                                                                                                                                   | ApEn                                                | ***   | *     |
| <b>gVARVI</b><br>[256]                     | Python | Windows,<br>Linux, MacOS | yes     | HRV                      |                                        | no                                                                                                                                                       | no                                                  | **    | *     |
| <b>hrv</b><br>[58]                         | Python |                          | yes [F] | HRV                      | RRi                                    | PP                                                                                                                                                       | no                                                  | *     | *     |
| <b>HRV Toolkit</b><br>(PhysioNet)<br>[257] | C      | Windows,<br>Linux, MacOS | no [F]  | HRV                      | txt, wfdb [B]                          | 0                                                                                                                                                        | 0                                                   | ***   | *     |
| <b>HRVAnalysis</b><br>[15]                 | MATLAB | Windows                  | yes [F] | HRV                      | edf, ishne,<br>binary, txt, mat<br>[B] | HFD, KFD, H,<br>DFA, 1/f slope,<br>LLE, PP, LZC                                                                                                          | SE, CE, CCE,<br>normalised<br>CCE, ApEn,<br>SampEn  | ***** | **    |
| <b>HRVFrame</b><br>[14]                    | Java   | Windows,<br>Linux, MacOS | yes [F] | HRV                      | Txt [B]                                | FD & HFD, AF,<br>H, D2, DFA,<br>LLE, RPA, PP,<br>LZC; Central<br>Tendency<br>Measure (CTM),<br>Sequential<br>Trend Analysis,<br>Spatial Filling<br>Index | Carnap Entropy<br>1D,* CCE,<br>fApEn, RE,<br>SampEn | **    | *     |



|                                                       |              |                          |         |                                       |                                                                     |                                  |                                                  |       |       |
|-------------------------------------------------------|--------------|--------------------------|---------|---------------------------------------|---------------------------------------------------------------------|----------------------------------|--------------------------------------------------|-------|-------|
| <b>HRVAS</b><br>[21]                                  | MATLAB       |                          | yes [F] | HRV                                   | ibi, txt                                                            | DFA, PP                          | SampEn                                           | ***   | *     |
| <b>HRVTool</b><br>[47]                                | MATLAB       | Windows,<br>Linux, MacOS | yes [F] | HRV                                   | ECG, IBI; many<br>formats (e.g.<br>EDF, ISHNE,<br>WAV, HRM)<br>[B]  | D2, DFA, PP                      | ApEn                                             | **    | *     |
| <b>Information<br/>Breakdown<br/>ToolBox</b><br>[258] | MATLAB (& C) | Windows,<br>Linux, MacOS | [F]     | EEG, local field<br>potentials (LFP)  |                                                                     | no                               | noise/response<br>entropy; mutual<br>information | ***   | ***   |
| <b>Kaplan's<br/>software for<br/>HRV</b><br>[52]      | MATLAB       |                          | no      | HRV                                   |                                                                     | DFA                              | ApEn                                             | **    |       |
| <b>KARDIA</b><br>[26]                                 | MATLAB       | Windows,<br>Linux, MacOS | yes [F] | HRV                                   | IBI [B]                                                             | DFA                              | no                                               | **    | **    |
| <b>Kubios HRV</b><br>[13]                             | MATLAB       | Windows,<br>Linux        | yes [f] | HRV                                   | IBI, ECG (txt,<br>acq, edf, gdf,<br>dat, hrm, sdf,<br>ste, mat) [b] | D2, RQA, PP                      | ApEn, SampEn                                     | ***** | ***** |
| <b>LabVIEW</b><br>[4]                                 |              |                          | yes     | signal<br>acquisition &<br>processing |                                                                     | no                               | no                                               |       |       |
| <b>MATLAB-based<br/>GUI</b><br>[8]                    | MATLAB       |                          | yes     |                                       |                                                                     | LLE                              | SE ('entropy')                                   | *     | *     |
| <b>Matrix of Lags<br/>(MoL)</b><br>[34]               |              |                          |         | EEG, ECG                              |                                                                     | FD, DFA, LZC                     | SE, TE, SampEn                                   | *     | *     |
| <b>MATS</b><br>[31]                                   | MATLAB       |                          | yes [F] | any scalar time<br>series; EEG        | ASCII, .xls,<br>.mat, .edf [B]                                      | D2, Correlation<br>sum, DFA, LZC | ApEn                                             | **    | *     |

|                                                                            |        |                          |               |                                                                                                |                                       |                                                              |                                                                 |     |    |
|----------------------------------------------------------------------------|--------|--------------------------|---------------|------------------------------------------------------------------------------------------------|---------------------------------------|--------------------------------------------------------------|-----------------------------------------------------------------|-----|----|
| <b>MULTISAB</b><br>[33]                                                    | Java   |                          | yes           | ECG, EEG,<br>EMG, ...                                                                          | .an n, .csv, .txt,<br>.edf/.edf+c [B] | as for<br>HRVFrame,<br>plus<br>synchronisation<br>likelihood | as for<br>HRVFrame,<br>plus alphabet<br>entropy *               | **  | *  |
| <b>NeuroKit2</b><br>[259]                                                  | Python |                          | no [F]        | ECG, EDA,<br>EMG, EOG,<br>PPG (and<br>eventually EEG)                                          |                                       |                                                              |                                                                 | **  |    |
| <b>Physiolyze</b><br>(PyHRV)<br>[43]                                       | Python |                          | yes (web) [F] | HRV                                                                                            | RRi, ECG, BVP                         | FD, D2, H,<br>DFA, LLE,<br>RQA, PP                           | ApEn, SampEn,<br>SVD (singular<br>value<br>decomposition)<br>En | **  | *  |
| <b>PhysioNet</b><br><b>Cardiovascular</b><br><b>Signal Toolbox</b><br>[51] | MATLAB | Windows,<br>Linux, MacOS | no [F]        | HRV                                                                                            | RRi, ECG (txt,<br>wfdb, mat) [B]      | DFA                                                          | ApEn, SampEn                                                    | *** | ** |
| <b>PhysioScripts</b><br>[260]                                              | R      | Windows,<br>Linux, MacOS | yes [F]       | ECG, RRi, Resp                                                                                 | .txt, .csv [B]                        | no                                                           | no                                                              | **  | ** |
| <b>POLYAN</b><br>[12]                                                      | MATLAB | Windows                  | yes           | heart period,<br>aBP, lung<br>volume, O2 sat.,<br>LVV, muscle<br>sympathetic<br>nerve activity |                                       | no                                                           | no                                                              | **  | ** |
| <b>PyBioS</b><br>[24]                                                      | Python | Windows,<br>Linux, MacOS | yes [F]       | cardiovascular<br>(or e.g. Resp,<br>Stride, EEG)                                               | ASCII, .xls or<br>.xlsx [B]           | DFA                                                          | SampEn, FE,<br>PE, DE, DistEn,<br>PhEn                          | *   | *  |
| <b>PyEntropy</b><br>[261, 262]                                             | Python |                          |               | analysis of<br>neural data                                                                     |                                       | no                                                           | maximum<br>entropy, noise<br>entropy,<br>response<br>entropy    | **  | ** |

|                                          |              |                          |             |                         |                                                     |                                                                      |                                            |       |       |
|------------------------------------------|--------------|--------------------------|-------------|-------------------------|-----------------------------------------------------|----------------------------------------------------------------------|--------------------------------------------|-------|-------|
| <b>PyHRV</b><br>[27]                     | Python       | Windows,<br>Linux, MacOS | no [F]      | HRV                     | ECG [B]                                             | DFA, PP                                                              | SampEn                                     | **    |       |
| <b>RHRV</b><br>[22, 23]                  | R            | Windows,<br>Linux        | yes [F]     | HRV                     | ascii, edf+ [B]                                     | generalised D2,<br>Information<br>dimension,<br>DFA, LLE,<br>RQA, PP | ApEn, SampEn                               | *     | *     |
| <b>RR-APET</b><br>[10]                   | Python       | Windows,<br>Linux, MacOS | yes [F]     | HRV                     | txt, mat, h5,<br>wfdb [B]                           | DFA, RQA, PP                                                         | no                                         | **    | *     |
| <b>SinusCor</b><br>[64]                  | MATLAB       |                          | yes [F]     | HRV                     | RRi, ECG (.txt,<br>.hrm, .sdf, .bin,<br>.acq, .abf) | PP                                                                   | no                                         | ***   | **    |
| <b>Software tool<br/>for HRV</b><br>[59] | MATLAB       |                          | yes [F]     | HRV                     | ECG, RRi<br>(binary, text or<br>system-specific)    | PP (for T-wave<br>alternans,<br>TWA)                                 |                                            |       |       |
| <b>SPINE-HRV</b><br>[263]                |              |                          |             | HRV                     | RRi                                                 | n                                                                    | n                                          | **    | *     |
| <b>STAToolkit</b><br>[87]                | MATLAB (& C) | Windows,<br>Linux, MacOS | no [F]      | spike train<br>analysis | txt & other                                         | no                                                                   | classical & other<br>entropy<br>estimators | **    |       |
| <b>TISEAN</b><br>[30]                    |              |                          | no [F]      |                         |                                                     | D2, LLE, RQA,<br>PP                                                  |                                            | ***** | ***** |
| <b>UW DigiScope</b><br>[11]              | MATLAB       | Windows,<br>Linux, MacOS | yes         | signal<br>processing    | ECG, EEG,<br>EMG                                    | no                                                                   | no                                         | *     | *     |
| <b>ViewHRV</b><br>[50]                   | Python       |                          | web GUI [F] | HRV                     |                                                     | DFA, PP                                                              | no                                         | *     | *     |
| <b>WinEEG</b><br>[16]                    |              |                          | GUI         | EEG                     | ASCII, EDF [B]                                      | no                                                                   | no                                         | ***** | *     |
